# Supplementary material
Source: publisher figshare collection journal article supplement (https://plos.figshare.com/articles/dataset/_/149580)

Figure S5

Hormone-activated transcription of a luciferase reporter gene by full-length BfSR (black) and BfER (gray) is shown as fold activation relative to vehicle-only control. CHOK-1 cells were transfected with 5ng of receptor along with 50ng of pGL3-4(EREc38)-luc reporter plasmid, 0.1ng pRLtk reporter plasmid for normalization, and 50ng PUC19 for transfection efficiency. All hormone treatments were at 1 $\mu$ M concentration. DES; diethylstilbesterol, DHT; dihydrotestosterone, DHEA; dehydroepiandrosterone. Mean  $\pm$  SE of three replicates is shown.

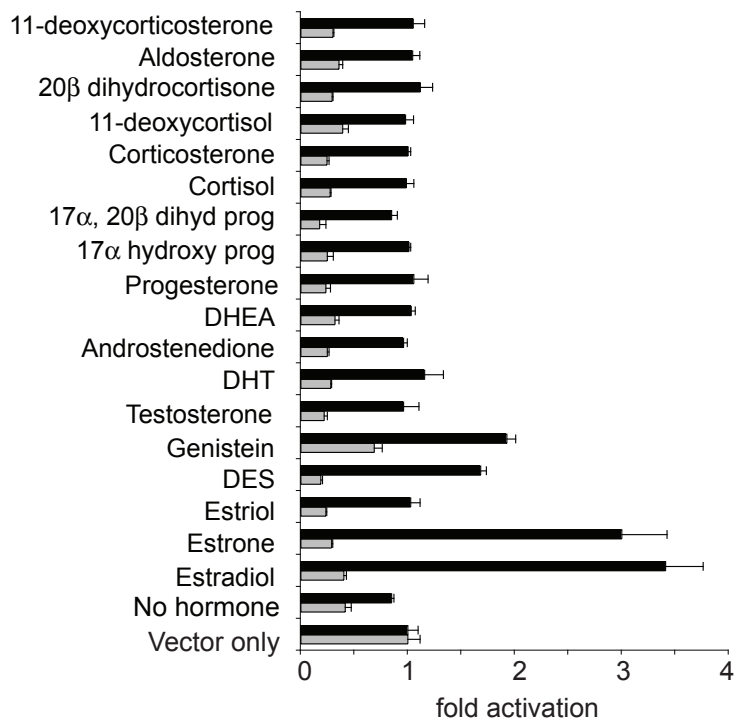

Supplement: Supplementary file [file 1]
