# Supplementary material
Source: publisher figshare collection journal article supplement (https://plos.figshare.com/articles/dataset/_/149580)

Figure S7  
Maximum likelihood steroid receptor phylogeny with  
chi-square support statistics for each node. Support statistics  
were calculated using PHYML software based on the approximate  
likelihood ratio for each node. The chi-square support represents  
1 - p, where p is the estimated probability that the degree of support  
observed for the labeled node would occur by chance if the node  
is false.

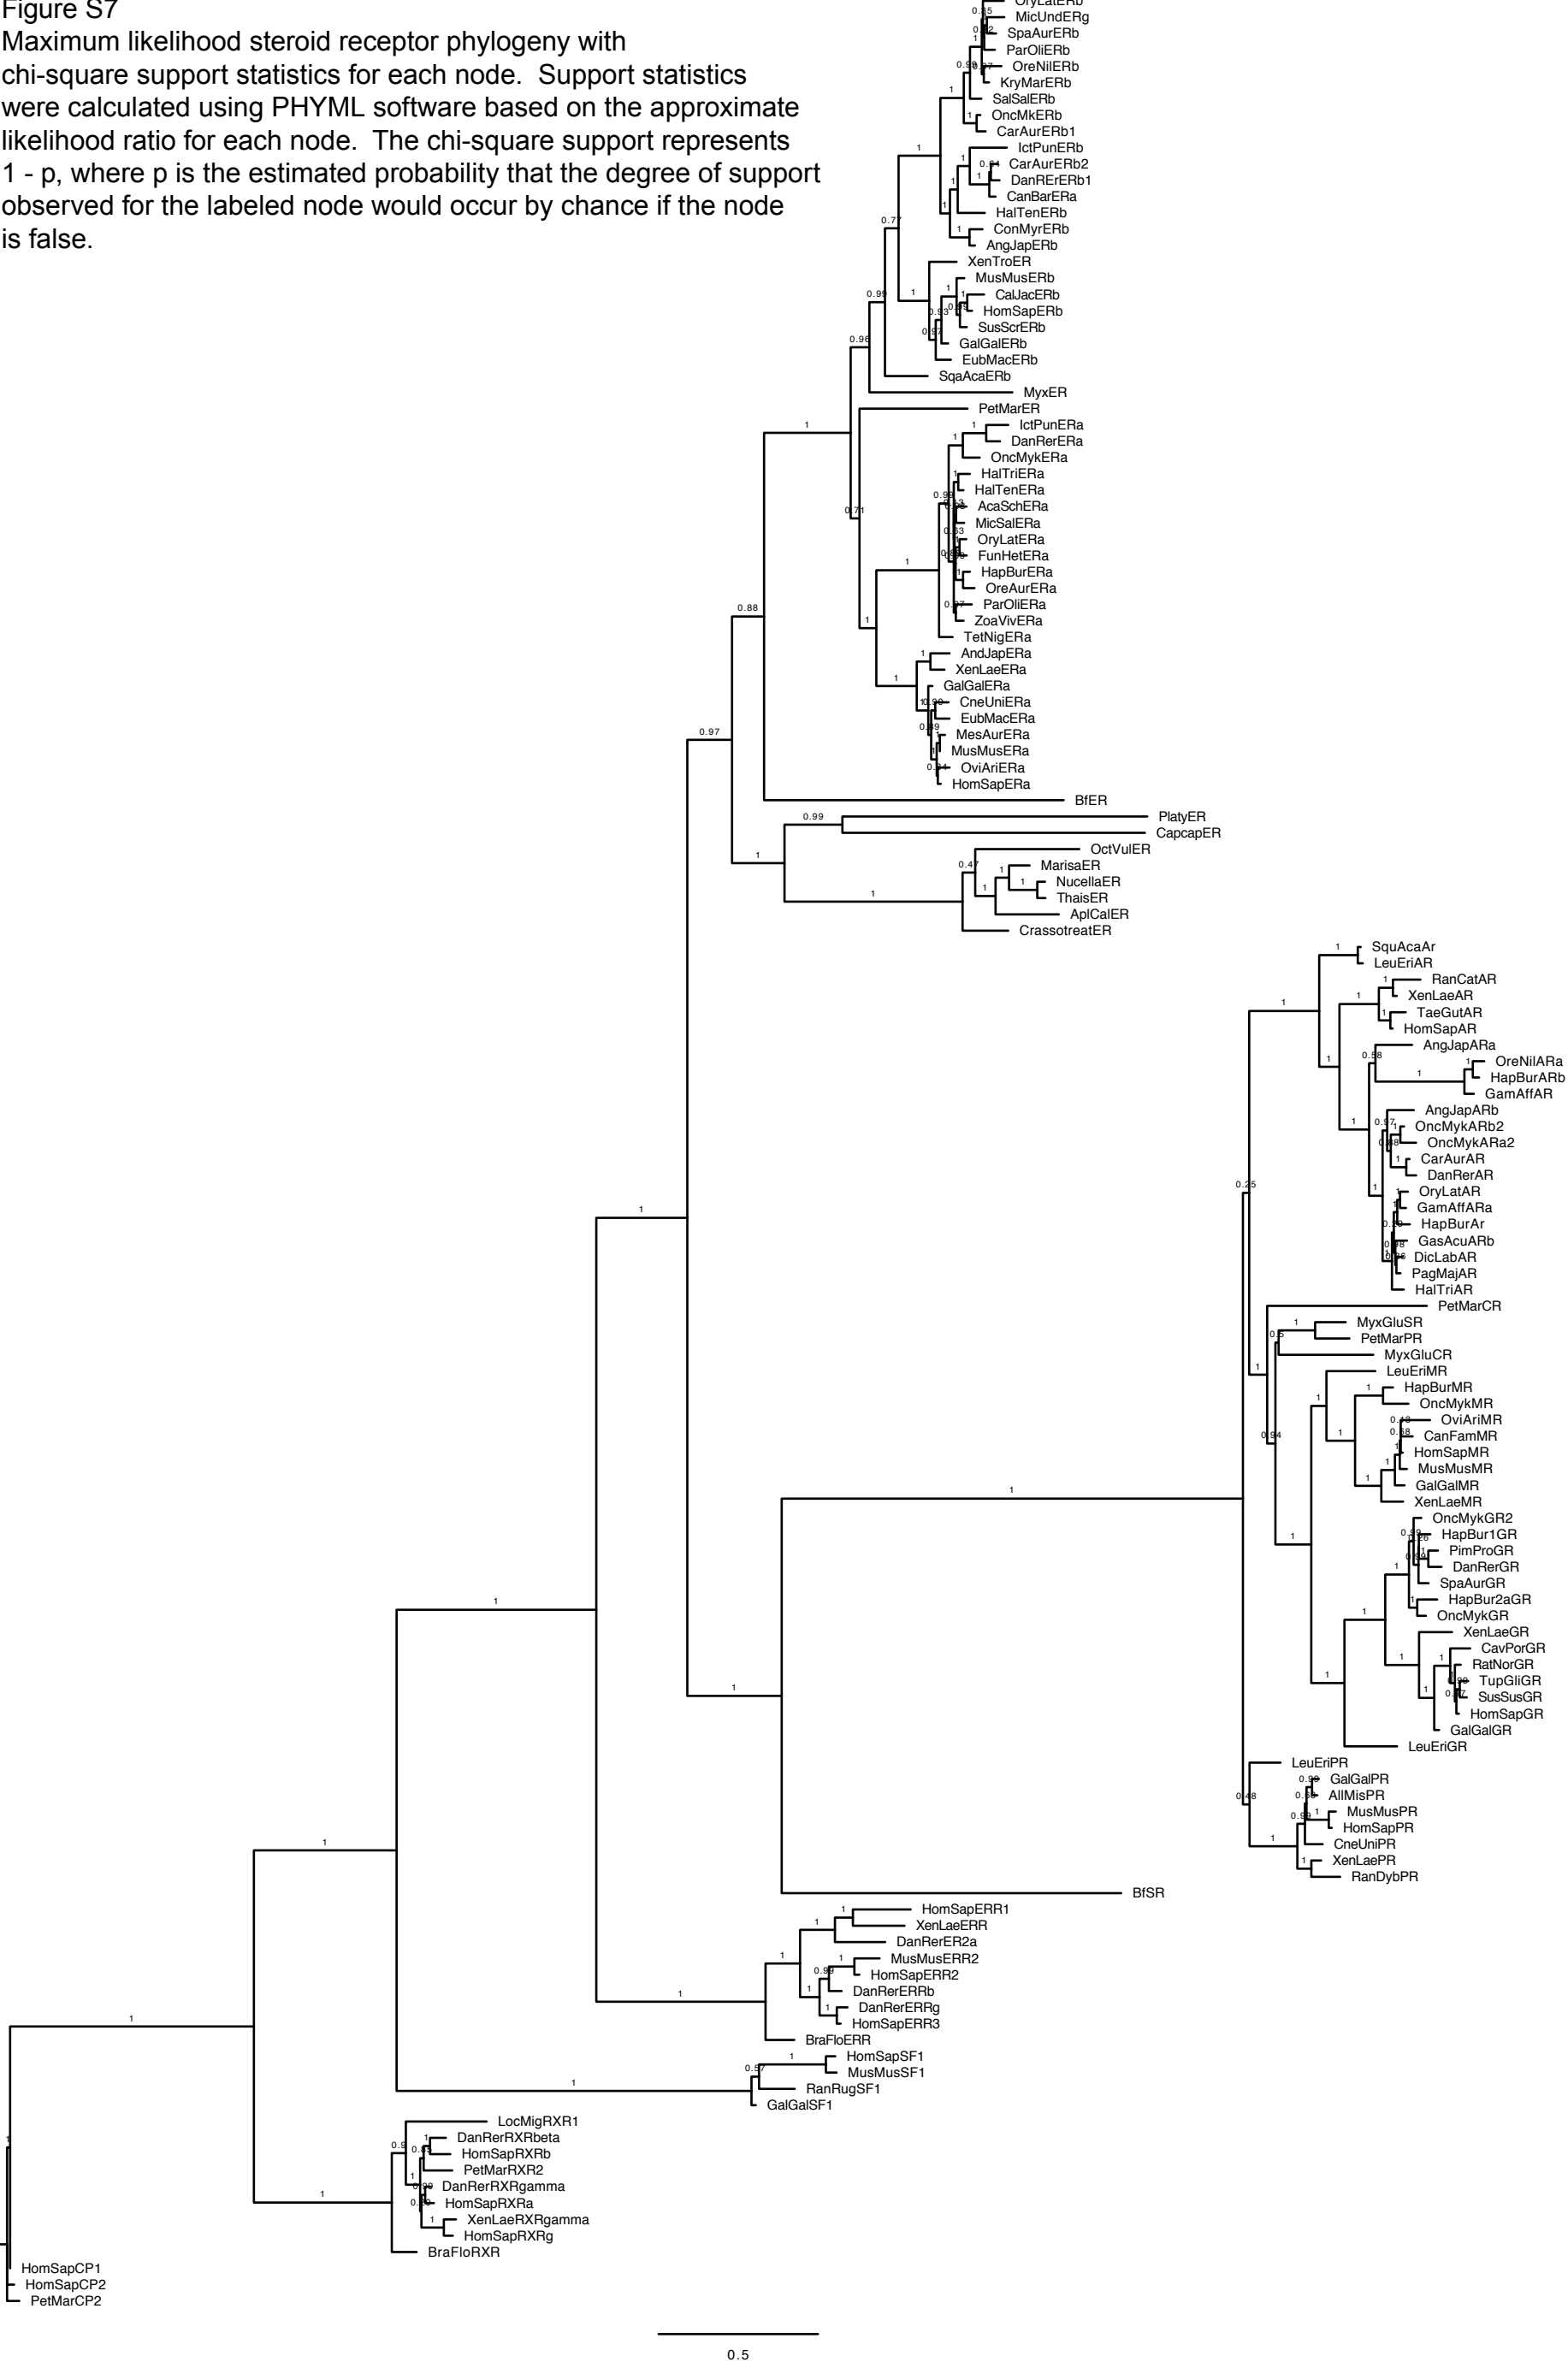

Supplement: Supplementary file [file 1]
