# Supplementary material
Source: publisher figshare collection journal article supplement (https://plos.figshare.com/articles/dataset/_/149580)

Figure S3

Maximum likelihood phylogeny of a reduced steroid receptor dataset inferred using a mixed model that incorporates heterotachy (see methods).

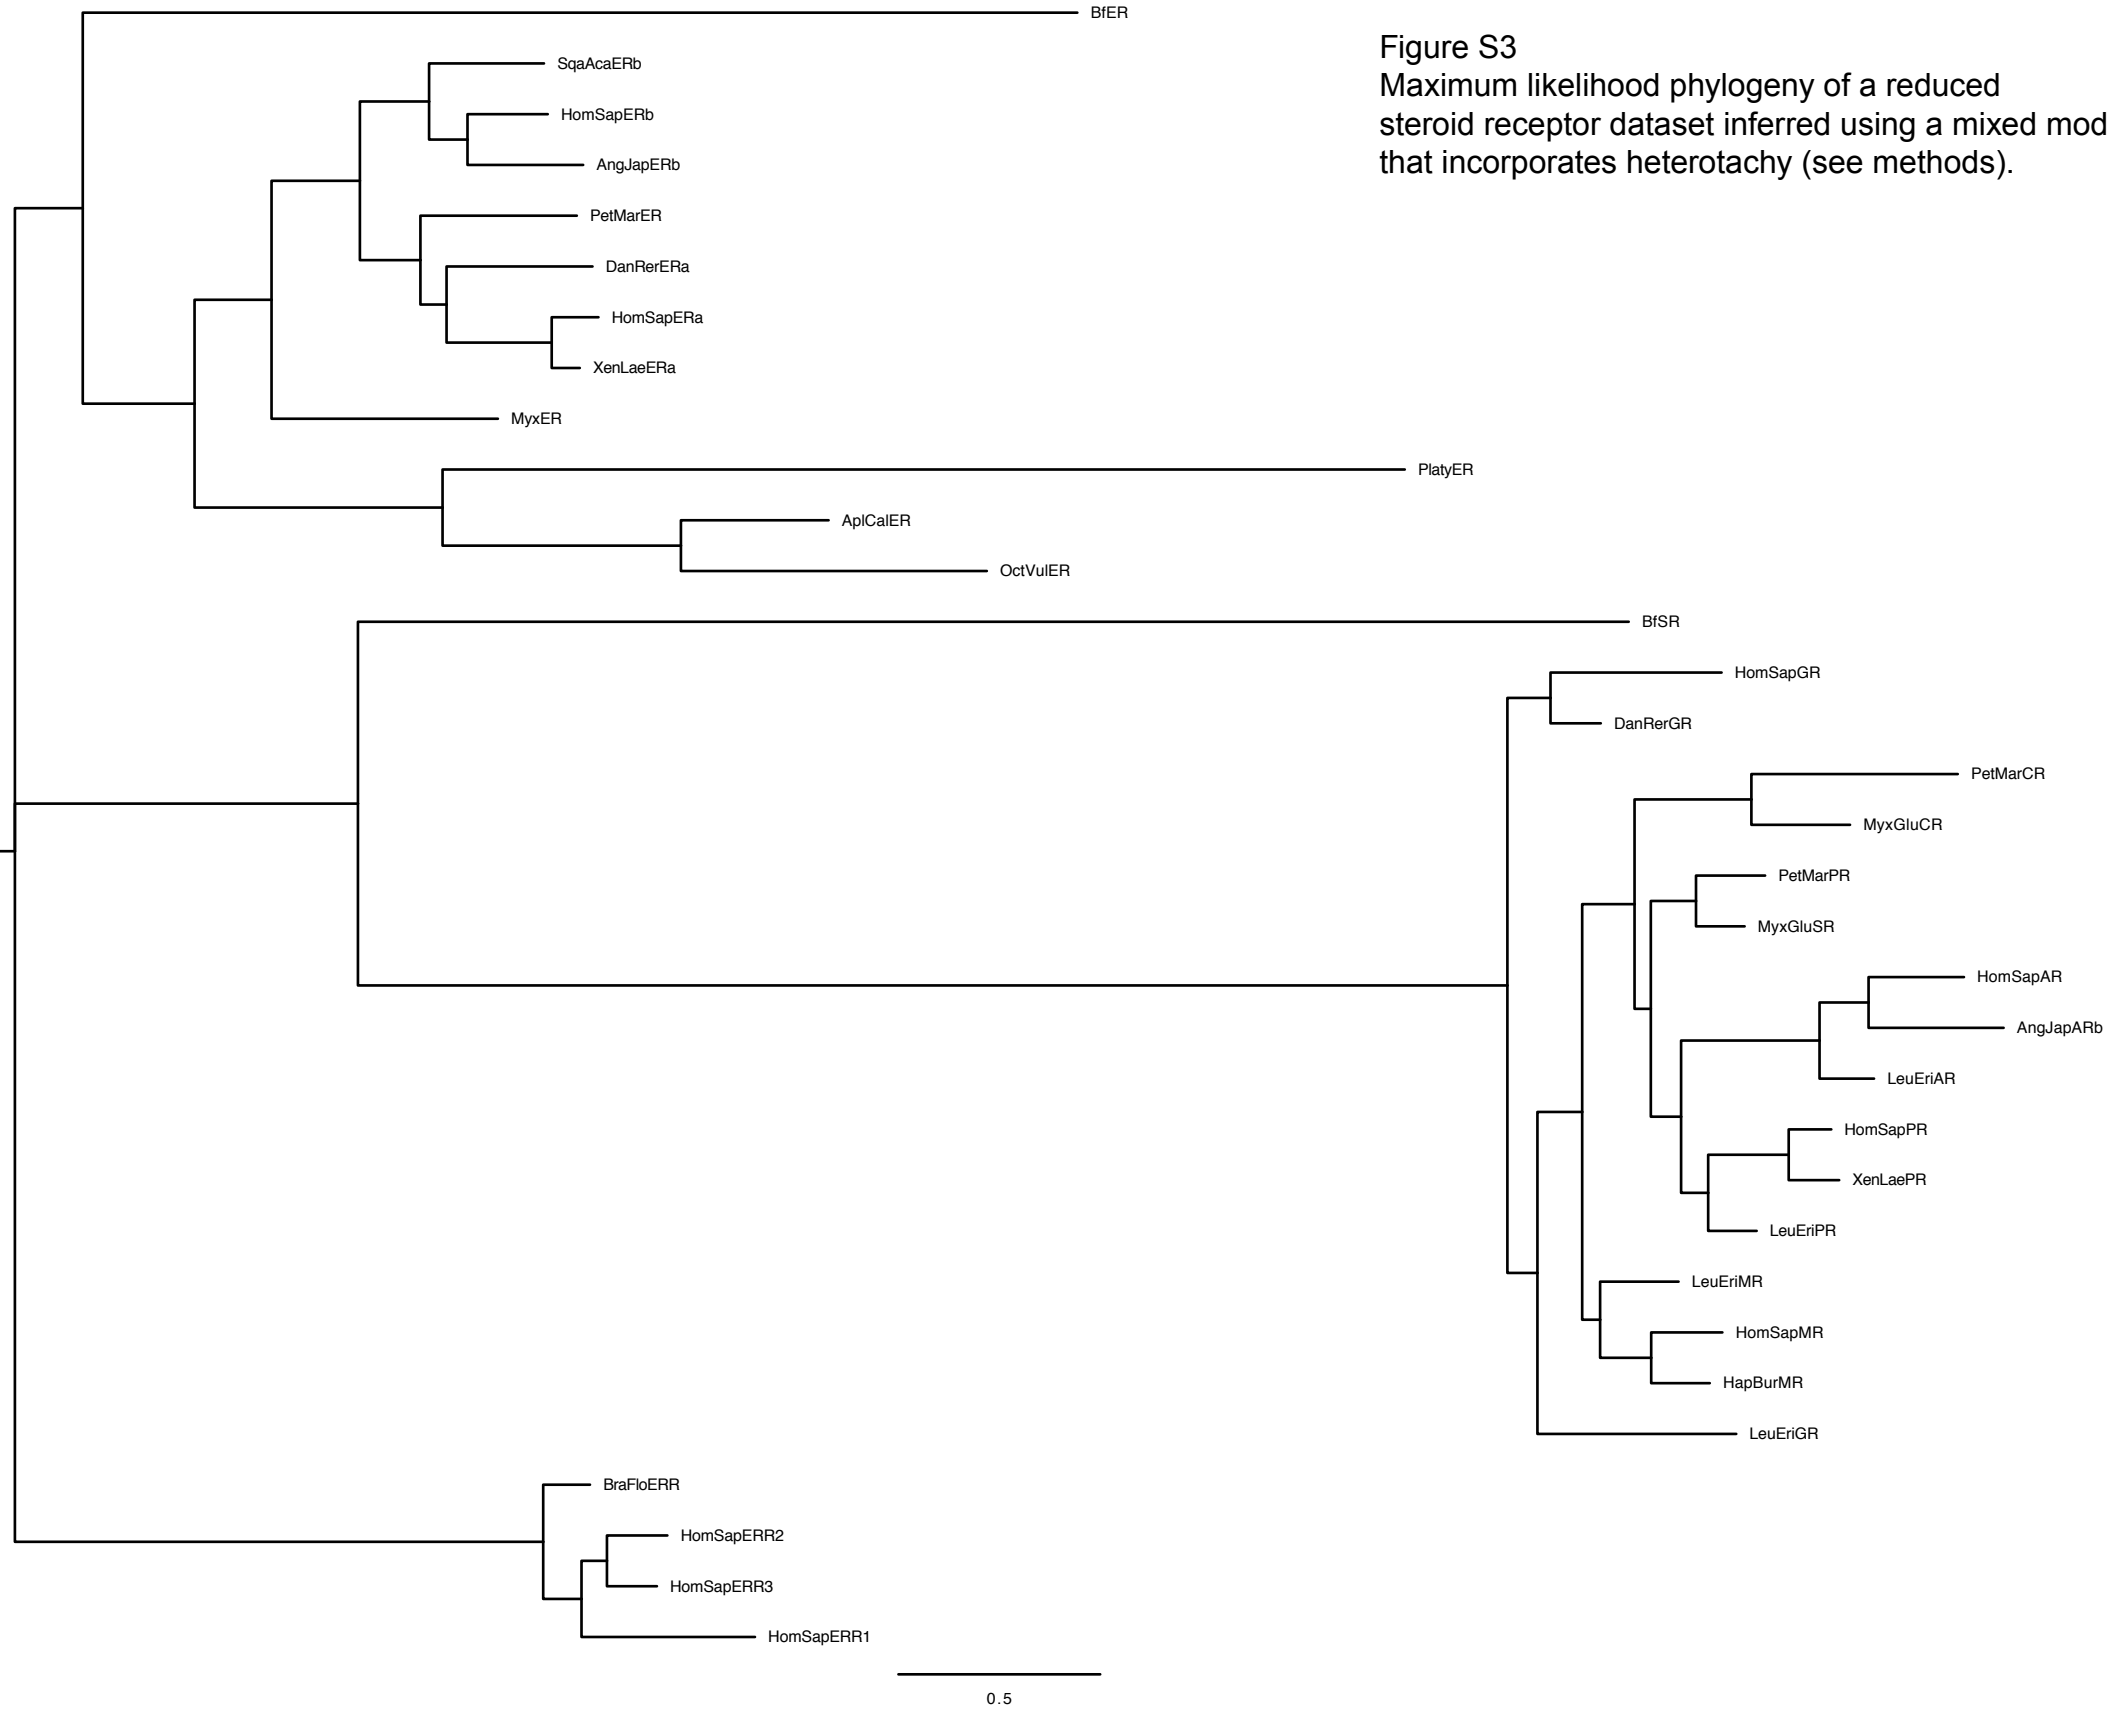

Supplement: Supplementary file [file 1]
