# Supplementary material
Source: publisher figshare collection journal article supplement (https://plos.figshare.com/articles/dataset/_/149580)
Supplement: Supplementary file [file 1]

Figure S2

Amino acid sequence alignment of steroid receptor ligand-binding domains (LBD), with cephalochordate receptors aligned to LBDs of human steroid receptors. Mutations of hormone contacting residues R394C and F404L (boxed) eliminate estradiol activated transcription and generate a repressor of wild-type BfSR.

|                  |                                                              |
|------------------|--------------------------------------------------------------|
| BfSR             | PTLPLYNPTVPLISHLVNIEPNPILTGYNPQCTPTEGYLMALVTDLANREIEGLVDWAAR |
| BfER             | LKALIDALDVKEGEHRGEENHPTGQQAGNWQEISNPELIESVSSLVDRELGTICWGKK   |
| HUMANER $\alpha$ | LSLTADQMVSALLDAEPP-ILYSEYDPTRPFFSEASMMGLLTNLADRELVHMINWAKR   |
| HumanER $\beta$  | DALSPEQLVLTLEAEPHVLI SR--PSAPFTEASMMMSLTKLADKELVHMISWAKK     |
| HumanGR          | QLTPTLVSLLEVIEPEVLYAGYDSSVPDSTWRIMTTLNMLGGRQVIAAVKWAKA       |
| HumanMR          | RALTSPSPVMVLENIEPEIVYAGYDSSKPDTAENLLSTLNRLAGKQMIQVVVKWAKV    |
| HumanPR          | GQDIQLIPLINLLMSIEPDVIYAGHDNTKPDTSSSLTSLNQLGERQLLSVVKWSKS     |
| HumanAR          | CQPIFLNVLEAIEPGVVCAGHDNNQPDSSFAALLSSLNELGERQLVHVVKWAKA       |

  

|                  |                                  |                                   |
|------------------|----------------------------------|-----------------------------------|
|                  | 394                              | 404                               |
| BfSR             | LPGYGMLPMDDQVNLI RTVWLDLLMLGLVWR | RSMEHRG-EWLVPAPDLLMD-----RSLCR    |
| BfER             | IPGYSKLSLNDQVLLMESTWLDLLILDLVWC  | SIRHKG-EKLLLSGGVLVNRNTISNRRNN     |
| HUMANER $\alpha$ | VPGFVDLTLDHQVHLLCAWLEILMIGLVWR   | RSMEHPG--KLLFAPNLLLDLDR-----NQGKC |
| HumanER $\beta$  | IPGFVELSLFDQVRLLESCWMEVLMGLMWR   | SIDHPG--KLIFAPDLVLDLDR-----DEGKC  |
| HumanGR          | IPGFRNLHLDQMTLLQYSWMFLMAFALGWR   | SYRQSSANLLCFAPDLI IN-----EQRMT    |
| HumanMR          | LPGFKNLPLEDQITLIQYSWMLCSSFALS    | WRSYKHTNSQFLYFAPDLVFN-----EEKMH   |
| HumanPR          | LPGFRNLHIDDQITLIQYSWMLMVFLGWR    | SYKHVSGQMLYFAPDLILN-----EQRMK     |
| HumanAR          | LPGFRNLHVDDQMAVIQYSWMGLMVFAMGWR  | SFTNVNSRMLYFAPDLVFN-----EYRMH     |

  

|                  |                                                               |
|------------------|---------------------------------------------------------------|
| BfSR             | LSG----MEYICTPMLEFARQFADLQVPQEVYVCLKALTLYTTAV-----SRLQDYRQVQR |
| BfER             | SSGDDMEVLEMCDQILSIATKFYFDLQRREYLCLKAITLVHG-----SLKGLESdT      |
| HUMANER $\alpha$ | VEG----MVEIFDMLLATSSRFMRMNLQGEFVCLKSI ILLNSGVYTFLSSTLKSLEEKD  |
| HumanER $\beta$  | VEG----ILEIFDMLLATSSRFRELKLQHKYLCVKAMILLNSSMYPLVTATQDADSSR-   |
| HumanGR          | LPC----MYDQCKHMLYVSSELHRLQVSYEEYLCMKTLLLLS-----SVPKDGLKSQE    |
| HumanMR          | QSA----MYELCQGMHQISLQFVRLQLTFFEYTIMKVLLLLS-----TIPKDGLKSQA    |
| HumanPR          | ESS----FYSLCLTMWQIPQEFVKLQVSQEEFLCMKVLLLLN-----TIPLEGLRSQT    |
| HumanAR          | KSR----MYSQCVRMRHLSQEFGLWQITPQEFELCMKALLLFS-----IIPVDGLKNQK   |

  

|                  |                                                              |
|------------------|--------------------------------------------------------------|
| BfSR             | LQHEINEALAEACSSSTFGFSPGNIRLMMIVSQVRQLSSLGVDHLNRLRGAETVSVEGLL |
| BfER             | QVRQLQDDLTDALMDVCSER--HALGSRRAKMLLL-----LSHLRQVSARASSHLG     |
| HUMANER $\alpha$ | HIHRVLDKITDTLIHLMAGLTLQQQHQLRAQLLLI-----LSHIRHMSNKGMEHLY     |
| HumanER $\beta$  | KLALLNNAVDALVWVIAKSGISSQQQSMRLANLLML-----LSHVRHASNKGMEHLL    |
| HumanGR          | LFDEIRMTYIKELGKAI VKREGNSSQNWRFYQLTKL-----LDSMHEVVENLLNYCF   |
| HumanMR          | AFEEMRTNYIKELRKMTKCPNNSGQSWQRFYQLTKL-----LDSMHDLVSDLLEFCF    |
| HumanPR          | QFEEMRSSYIRELIKAGLRQKGVVSSSQRFYQLTKL-----LDNLHDLVKQLHLYCL    |
| HumanAR          | FFDELRMNYIKELDRI IACKRKNTSCSRRFYQLTKL-----LDSVQPIARELHQFTF   |

  

|                  |                                                              |
|------------------|--------------------------------------------------------------|
| BfSR             | REIVDEPPRITEIEDSPGSAGNKMTMSRSAGKMECAASTSCTAQDEAVENSAAEAEAAE  |
| BfER             | AVRNLKVPDYDILLDILTQVSEGRDQQAHEVASSPEKER-----                 |
| HUMANER $\alpha$ | SMKCKNVVPDYDILLEMLDAHRLHAPTSRGGASVEETDQSHLATAGTSSSHSLQKYYITG |
| HumanER $\beta$  | NMKCKNVVPDYDILLEMLNAHVLRGCKSSITGSECSAEDSKSKEGSQNPQSQ-----    |
| HumanGR          | QTFLD-KTMSIEFPEMLAEIITNQIPKYSNGNIKKLLFHQ-----                |
| HumanMR          | YTFRESHALKVEFPAMLVEIISDQLPKVS-GNAKPLYFHRK-----               |
| HumanPR          | NTFIQSRALSVFPEMMSEVIAAQLPKILAGMVKPLLFHKK-----                |
| HumanAR          | DLLIKSHMVSVDPEMMAEIIISVQVPKILSGKVKPIYFHTQ-----               |

  

|                  |                                      |
|------------------|--------------------------------------|
| BfSR             | FAAQLKEVMEGEATTIADV KAMADQMGI EILDLD |
| BfER             | -----                                |
| HUMANER $\alpha$ | EAEGFPATV-----                       |
| HumanER $\beta$  | -----                                |
| HumanGR          | -----                                |
| HumanMR          | -----                                |
| HumanPR          | -----                                |
| HumanAR          | -----                                |
