# Supplementary material
Source: publisher figshare collection journal article supplement (https://plos.figshare.com/articles/dataset/_/149580)
Supplement: Supplementary file [file 1]

Figure S1

Amino acid sequence alignment of steroid receptor DNA-binding domains (DBD). The sequences for cephalochordate receptors are aligned with DBDs of human steroid receptor family members. Mutation of residue C205A (boxed) in BfER prevents binding to DNA response elements.

| DBD              | 205                                                                   |
|------------------|-----------------------------------------------------------------------|
| BfER             | CRVCGDHASGFHYGVWSCEGCKAFFKRSIQQGQTDYICPGTNQCTIDRNRRKSCQACRYRKCLMVGM   |
| BfSR             | CAVCHCPS TGLHYGVYACEGCKSFFHRAHK- RAHPYVCPANNNCVIDRRLKKNCPACRLKKCLAMGM |
| HumanER $\alpha$ | CAVCNDYASGYHYGVWSCEGCKAFFKRSIQ- GHNDYMCPATNQCTIDKNRRKSCQACRLRKCYESVGM |
| HumanER $\beta$  | CAVCSDYASGYHYGVWSCEGCKAFFKRSIQ- GHNDYICPATNQCTIDKNRRKSCQACRLRKCYESVGM |
| HumanGR          | CLVCSDEASGCHYGVLTCGSCKVFFKRAVE- GQHNYLCAGRNDCIIDKIRRKNCPACRYRKCLQAGM  |
| HumanMR          | CLVCGDEASGCHYGVVTCGSCKVFFKRAVE- GQHNYLCAGRNDCIIDKIRRKNCPACRLQKCLQAGM  |
| HumanPR          | CLICGDEASGCHYGVLTCGSCKVFFKRAME- GQHNYLCAGRND CIVDKIRRKNCPACRLRKCQAGM  |
| HumanAR          | CLICGDEASGCHYGALTCGSCKVFFKRAAE- GKQKYLCASRNDCTIDKFRRKNCPSCRLRKCYESAGM |
