# Supplementary material
Source: publisher figshare collection journal article supplement (https://plos.figshare.com/articles/dataset/_/149580)

Fig. S4. Synteny analysis of scaffolds containing BfER and BfSR with the human genome. (A) Dotplot between *B. floridae* scaffold 42 (Bf42), containing BfER, and the human genome. Each gene on the amphioxus scaffold is shown along the horizontal axis as a grey dot. Human orthologs, if any, are marked directly above each *B. floridae* gene with a red cross on the appropriate human chromosome. This plot shows strong conserved synteny between human chromosome 14 and Bf42. (B) Dotplot between *B. floridae* scaffold 507 (Bf507), containing BfSR, and the human genome. The plot shows few *B. floridae* proteins on Bf507, few human orthologs, and no signal of conserved synteny between Bf507 and the human genome.

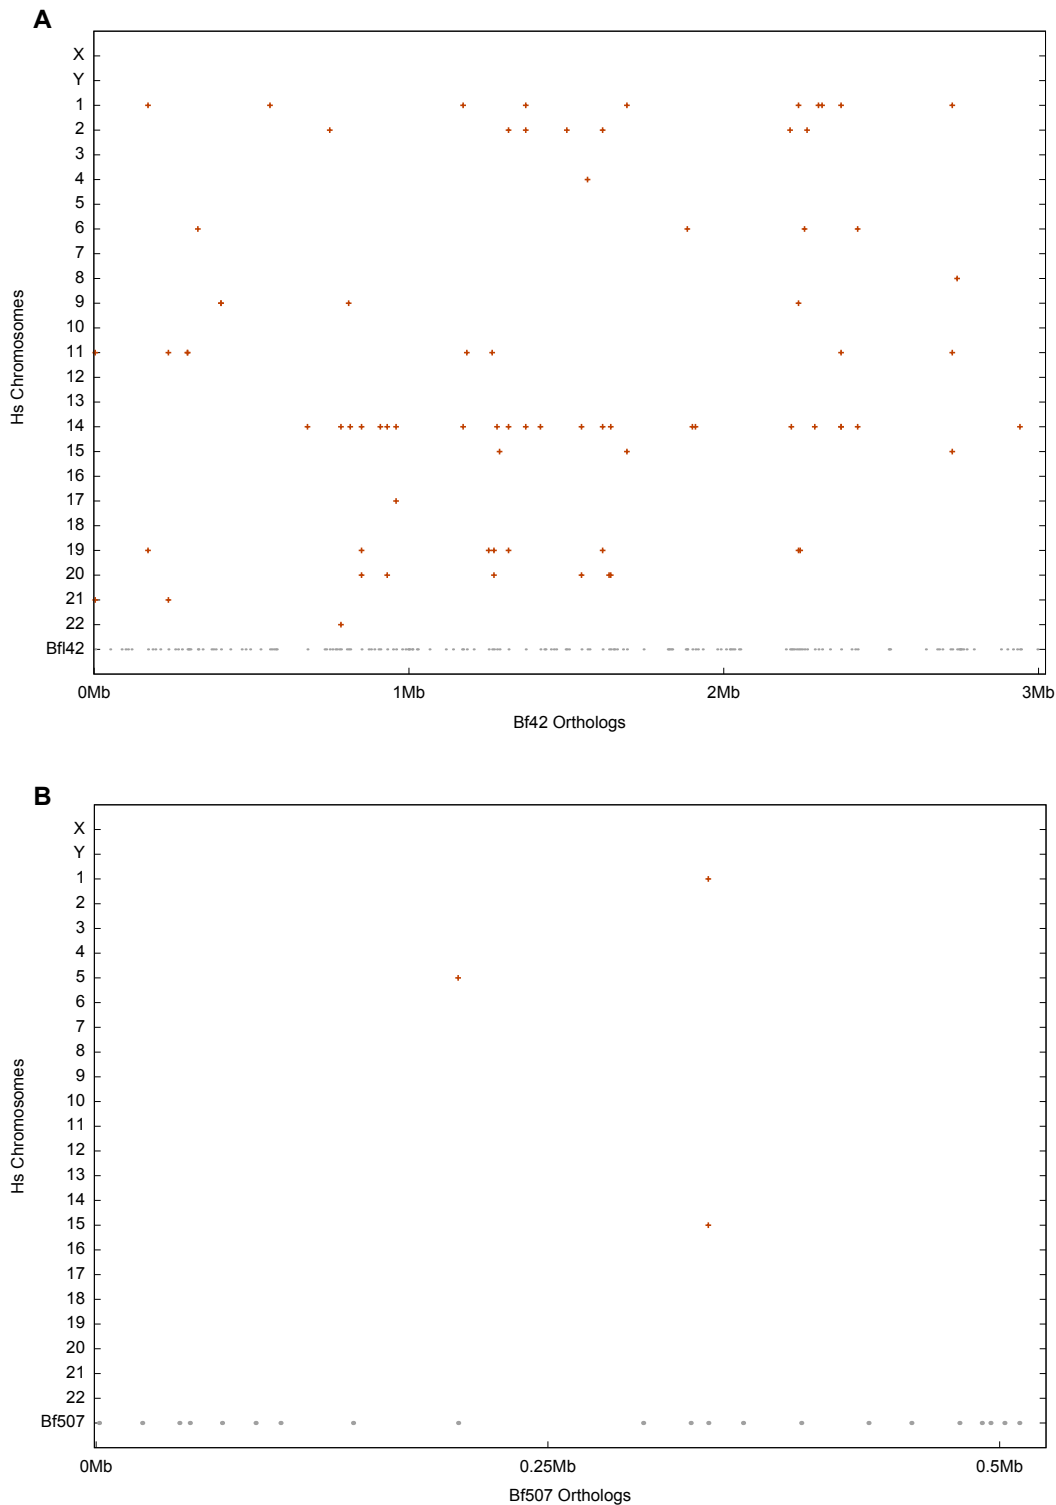

Supplement: Supplementary file [file 1]
