# Supplementary material
Source: publisher figshare collection journal article supplement (https://plos.figshare.com/articles/dataset/_/149580)
Supplement: Supplementary file [file 1]

Table S1 Sequences, species and accession numbers used in receptor phylogenies.

| Sequence name | Species name                      | Common Name             | Genbank or SwissProt accession# |
|---------------|-----------------------------------|-------------------------|---------------------------------|
| AcaSchERa     | <i>Acanthopagrus schlegeli</i>    | black porgy             | Q804Q6                          |
| AllMisPR      | <i>Alligator mississippiensis</i> | American alligator      | Q765N5                          |
| AndJapERa     | <i>Andrias japonicus</i>          | salamander              | Q0KKA1                          |
| AngJapARa     | <i>Anguilla japonica</i>          | Japanese eel            | Q9YGV9                          |
| AngJapARb     | <i>Anguilla japonica</i>          | Japanese eel            | Q9PWG5                          |
| AngJapERb     | <i>Anguilla japonica</i>          | Japanese eel            | BAA19851                        |
| ApiCalER      | <i>Aplysia californica</i>        | sea slug                | Q6VU64                          |
| BfER          | <i>Branchiostoma floridae</i>     | Florida amphioxus       | EU371730                        |
| BfSR          | <i>Branchiostoma floridae</i>     | Florida amphioxus       | EU371729                        |
| BraFloERR     | <i>Branchiostoma floridae</i>     | Florida amphioxus       | AAU88063                        |
| BraFloRXR     | <i>Branchiostoma floridae</i>     | Florida amphioxus       | Q8MX78                          |
| CalJacERb     | <i>Callithrix jacchus</i>         | common marmoset         | Q95171                          |
| CanBarERa     | <i>Candidia barbatus</i>          | Taiwanese cyprinid fish | Q7T3U5                          |
| CanFamMR      | <i>Canis familiaris</i>           | dog                     | XP_532685                       |
| CapcapER      | <i>Capitella capitata</i>         | polychaete worm         | EU497681                        |
| CarAurAR      | <i>Carassius auratus</i>          | goldfish                | Q8QFV2                          |
| CarAurERb1    | <i>Carassius auratus</i>          | goldfish                | Q9W669                          |
| CarAurERb2    | <i>Carassius auratus</i>          | goldfish                | Q9IAL9                          |
| CavPorGR      | <i>Cavia porcellus</i>            | guinea pig              | P49115                          |
| CneUniERa     | <i>Cnemidophorus uniparens</i>    | whip-tailed lizard      | Q8UWA9                          |
| CneUniPR      | <i>Cnemidophorus uniparens</i>    | whip-tailed lizard      | Q91425                          |
| ConMyrERb     | <i>Conger myriaster</i>           | conger eel              | Q762D6                          |
| CrassotreatER | <i>Crassostrea gigas</i>          | pacific oyster          | BAF45381                        |
| DanRerAR      | <i>Danio rerio</i>                | zebrafish               | Q6EAL5                          |
| DanRerER2a    | <i>Danio rerio</i>                | zebrafish               | Q7ZU32                          |
| DanRerERa     | <i>Danio rerio</i>                | zebrafish               | P57717                          |
| DanRErERb1    | <i>Danio rerio</i>                | zebrafish               | Q90WS9                          |
| DanRerERRb    | <i>Danio rerio</i>                | zebrafish               | Q6Q6F5                          |
| DanRerERRg    | <i>Danio rerio</i>                | zebrafish               | Q6Q6F4                          |
| DanRerGR      | <i>Danio rerio</i>                | zebrafish               | NP_001018547                    |
| DanRerRXRbeta | <i>Danio rerio</i>                | zebrafish               | Q7SYN5                          |
| DanRerRXRgamn | <i>Danio rerio</i>                | zebrafish               | 18859345                        |
| DicLabAR      | <i>Dicentrarchus labrax</i>       | European sea bass       | Q4G497                          |
| EubMacERa     | <i>Eublepharis macularius</i>     | leopard gecko           | Q2HWK5                          |
| EubMacERb     | <i>Eublepharis macularius</i>     | leopard gecko           | Q2HWK4                          |
| FunHetERa     | <i>Fundulus heteroclitus</i>      | killifish               | Q7SZI0                          |
| GalGalERa     | <i>Gallus gallus</i>              | chicken                 | P06212                          |
| GalGalERb     | <i>Gallus gallus</i>              | chicken                 | Q9PTU5                          |
| GalGalGR      | <i>Gallus gallus</i>              | chicken                 | Q38HX7                          |

|            |                          |                          |           |
|------------|--------------------------|--------------------------|-----------|
| GalGalMR   | Gallus gallus            | chicken                  | XP_420437 |
| GalGalPR   | Gallus gallus            | chicken                  | P07812    |
| GalGalSF1  | Gallus gallus            | chicken                  | Q9PW17    |
| GamAffAR   | Gambusia affinis         | western mosquitofish     | Q60I32    |
| GamAffARa  | Gambusia affinis         | western mosquitofish     | Q60GT9    |
| GasAcuARb  | Gasterosteus aculeatus   | three-spined stickleback | Q801Z2    |
| HalTenERa  | Halichoeres tenuispinis  | wrasse                   | Q7T2K8    |
| HalTenERb  | Halichoeres tenuispinis  | wrasse                   | Q7T2K7    |
| HalTriAR   | Halichoeres trimaculatus | protogynous wrasse       | Q9DDJ4    |
| HalTriERa  | Halichoeres trimaculatus | protogynous wrasse       | Q9DDJ3    |
| HapBur1GR  | Haplochromis burtoni     | African cichlid          | Q8JJ92    |
| HapBur2aGR | Haplochromis burtoni     | African cichlid          | Q8JJ91    |
| HapBurAr   | Haplochromis burtoni     | African cichlid          | Q9W6F4    |
| HapBurARb  | Haplochromis burtoni     | African cichlid          | Q8QFV7    |
| HapBurERa  | Haplochromis burtoni     | African cichlid          | Q6TGB3    |
| HapBurMR   | Haplochromis burtoni     | African cichlid          | Q8JJ89    |
| HomSapAR   | Homo sapiens             | human                    | P10275    |
| HomSapCP1  | Homo sapiens             | human                    | P10589    |
| HomSapCP2  | Homo sapiens             | human                    | P24468    |
| HomSapERa  | Homo sapiens             | human                    | P03372    |
| HomSapERb  | Homo sapiens             | human                    | Q92731    |
| HomSapERR1 | Homo sapiens             | human                    | P11474    |
| HomSapERR2 | Homo sapiens             | human                    | O95718    |
| HomSapERR3 | Homo sapiens             | human                    | P26508    |
| HomSapGR   | Homo sapiens             | human                    | P04150    |
| HomSapMR   | Homo sapiens             | human                    | P08235    |
| HomSapPR   | Homo sapiens             | human                    | P06401    |
| HomSapRXRa | Homo sapiens             | human                    | P1979     |
| HomSapRXRb | Homo sapiens             | human                    | P28702    |
| HomSapRXRg | Homo sapiens             | human                    | P48443    |
| HomSapSF1  | Homo sapiens             | human                    | Q13285    |
| IctPunERa  | Ictalurus punctatus      | channel catfish          | Q9YHZ7    |
| IctPunERb  | Ictalurus punctatus      | channel catfish          | Q9IAK1    |
| KryMarERb  | Kryptolebias marmoratus  | mangrove rivulus         | Q0KKB9    |
| LeuEriAR   | Leucoraja erinacea       | little skate             | Q1KXY2    |
| LeuEriGR   | Leucoraja erinacea       | little skate             | Q1KXY4    |
| LeuEriMR   | Leucoraja erinacea       | little skate             | Q1KXY3    |
| LeuEriPR   | Leucoraja erinacea       | little skate             | Q1KXY1    |
| LocMigRXR1 | Locusta migratoria       | locust                   | Q6V7U7    |
| MarisaER   | Marisa cornuarietis      | freshwater snail         | ABI97119  |
| MesAurERa  | Mesocricetus auratus     | golden hamster           | Q9QZJ5    |
| MicSalERa  | Micropterus salmoides    | largemouth bass          | Q9DDZ4    |
| MicUndERg  | Micropogonias undulatus  | Atlantic croaker         | P57783    |

|            |                        |                   |          |
|------------|------------------------|-------------------|----------|
| MusMusERa  | Mus musculus           | mouse             | P19785   |
| MusMusERb  | Mus musculus           | mouse             | O08537   |
| MusMusERR2 | Mus musculus           | mouse             | Q61539   |
| MusMusMR   | Mus musculus           | mouse             | Q8VII8   |
| MusMusPR   | Mus musculus           | mouse             | Q00175   |
| MusMusSF1  | Mus musculus           | mouse             | P33242   |
| MyxER      | Myxine glutinosa       | hagfish           | EU439936 |
| MyxGluCR   | Myxine glutinosa       | hagfish           | ABD46742 |
| MyxGluSR   | Myxine glutinosa       | hagfish           | ABD46743 |
| NucellaER  | Nucella lapillus       | gastropod         | ABQ96884 |
| OctVulER   | Octopus vulgaris       | octopus           | Q19AB0   |
| OncMkERb   | Oncorhynchus mykiss    | rainbow trout     | P57782   |
| OncMykARa2 | Oncorhynchus mykiss    | rainbow trout     | O93244   |
| OncMykARb2 | Oncorhynchus mykiss    | rainbow trout     | O93245   |
| OncMykERa  | Oncorhynchus mykiss    | rainbow trout     | P16058   |
| OncMykGR   | Oncorhynchus mykiss    | rainbow trout     | P49843   |
| OncMykGR2  | Oncorhynchus mykiss    | rainbow trout     | Q6RKQ3   |
| OncMykMR   | Oncorhynchus mykiss    | rainbow trout     | Q5WP02   |
| OreAurERa  | Oreochromis aureus     | Israel tilapia    | P50240   |
| OreNilARa  | Oreochromis niloticus  | Nile tilapia      | Q8UWB8   |
| OreNilERb  | Oreochromis niloticus  | Nile tilapia      | Q7T3U4   |
| OryLatAR   | Oryzias latipes        | Japanese ricefish | Q76LM5   |
| OryLatERa  | Oryzias latipes        | Japanese ricefish | P50241   |
| OryLatERb  | Oryzias latipes        | Japanese ricefish | Q8UW75   |
| OviAriERa  | Ovis aries             | sheep             | Q95L13   |
| OviAriMR   | Ovis aries             | sheep             | Q9BDJ7   |
| PagMajAR   | Pagrus major           | red sea bream     | O93497   |
| ParOliERa  | Paralichthys olivaceus | Japanses flounder | Q8QHL0   |
| ParOliERb  | Paralichthys olivaceus | Japanses flounder | Q8QHK9   |
| PetMarCP2  | Petromyzon marinus     | sea lamprey       | Q801J3   |
| PetMarCR   | Petromyzon marinus     | sea lamprey       | AAK20930 |
| PetMarER   | Petromyzon marinus     | sea lamprey       | AAK20929 |
| PetMarPR   | Petromyzon marinus     | sea lamprey       | AAK20931 |
| PetMarRXR2 | Petromyzon marinus     | sea lamprey       | Q2PK06   |
| PimProGR   | Pimephales promelas    | fathead minnow    | Q2TU59   |
| PlatyER    | Platynereis dumerilii  | annelid           | EU482033 |
| RanCatAR   | Rana catesbeiana       | bullfrog          | Q7T1K4   |
| RanDybPR   | Rana dybowskii         | Korean brown frog | Q8AYI2   |
| RanRugSF1  | Rana rugosa            | frog              | BAA36789 |
| RatNorGR   | Rattus norvegicus      | rat               | P06536   |
| SalSalERb  | Salmo salar            | Atlantic salmon   | Q6R7S4   |
| SpaAurERb  | Sparus aurata          | gilthead seabream | Q9W6M2   |
| SpaAurGR   | Sparus aurata          | gilthead seabream | Q1HGK6   |

|               |                        |                          |          |
|---------------|------------------------|--------------------------|----------|
| SqaAcaERb     | Squalus acanthias      | spiny dogfish            | Q90ZE6   |
| SquAcaAr      | Squalus acanthias      | spiny dogfish            | AAP55843 |
| SusScrERb     | Sus scrofa             | pig                      | Q9XSW2   |
| SusSusGR      | Sus scrofa             | pig                      | Q9N1U3   |
| TaeGutAR      | Taeniopygia guttata    | zebrafinch               | Q2VP86   |
| TetNigERa     | Tetraodon nigroviridis | green-spotted pufferfish | CAG03596 |
| ThaisER       | Thais clavigera        | marine snail             | BAC66480 |
| TupGliGR      | Tupaia glis            | common tree shrew        | Q95267   |
| XenLaeAR      | Xenopus laevis         | African clawed toad      | P70048   |
| XenLaeERa     | Xenopus laevis         | African clawed toad      | P81559   |
| XenLaeERR     | Xenopus laevis         | African clawed toad      | Q6AX97   |
| XenLaeGR      | Xenopus laevis         | African clawed toad      | P49844   |
| XenLaeMR      | Xenopus laevis         | African clawed toad      | Q66J29   |
| XenLaePR      | Xenopus laevis         | African clawed toad      | Q9DDU9   |
| XenLaeRXRgamn | Xenopus laevis         | African clawed toad      | P51129   |
| XenTroER      | Xenopus tropicalis     | clawed toad              | Q6W5G8   |
| ZoaVivERa     | Zoarces viviparus      | Eelpout (fish)           | Q800Q2   |
