# Supplementary material
Source: publisher figshare collection journal article supplement (https://plos.figshare.com/articles/dataset/_/149580)

HomSapCP2  
PetMarCP2  
HomSapCP1

Figure S8  
Steroid receptor phylogeny  
inferred using Bayesian MCMC. Node  
labels show posterior probabilities (>50%).

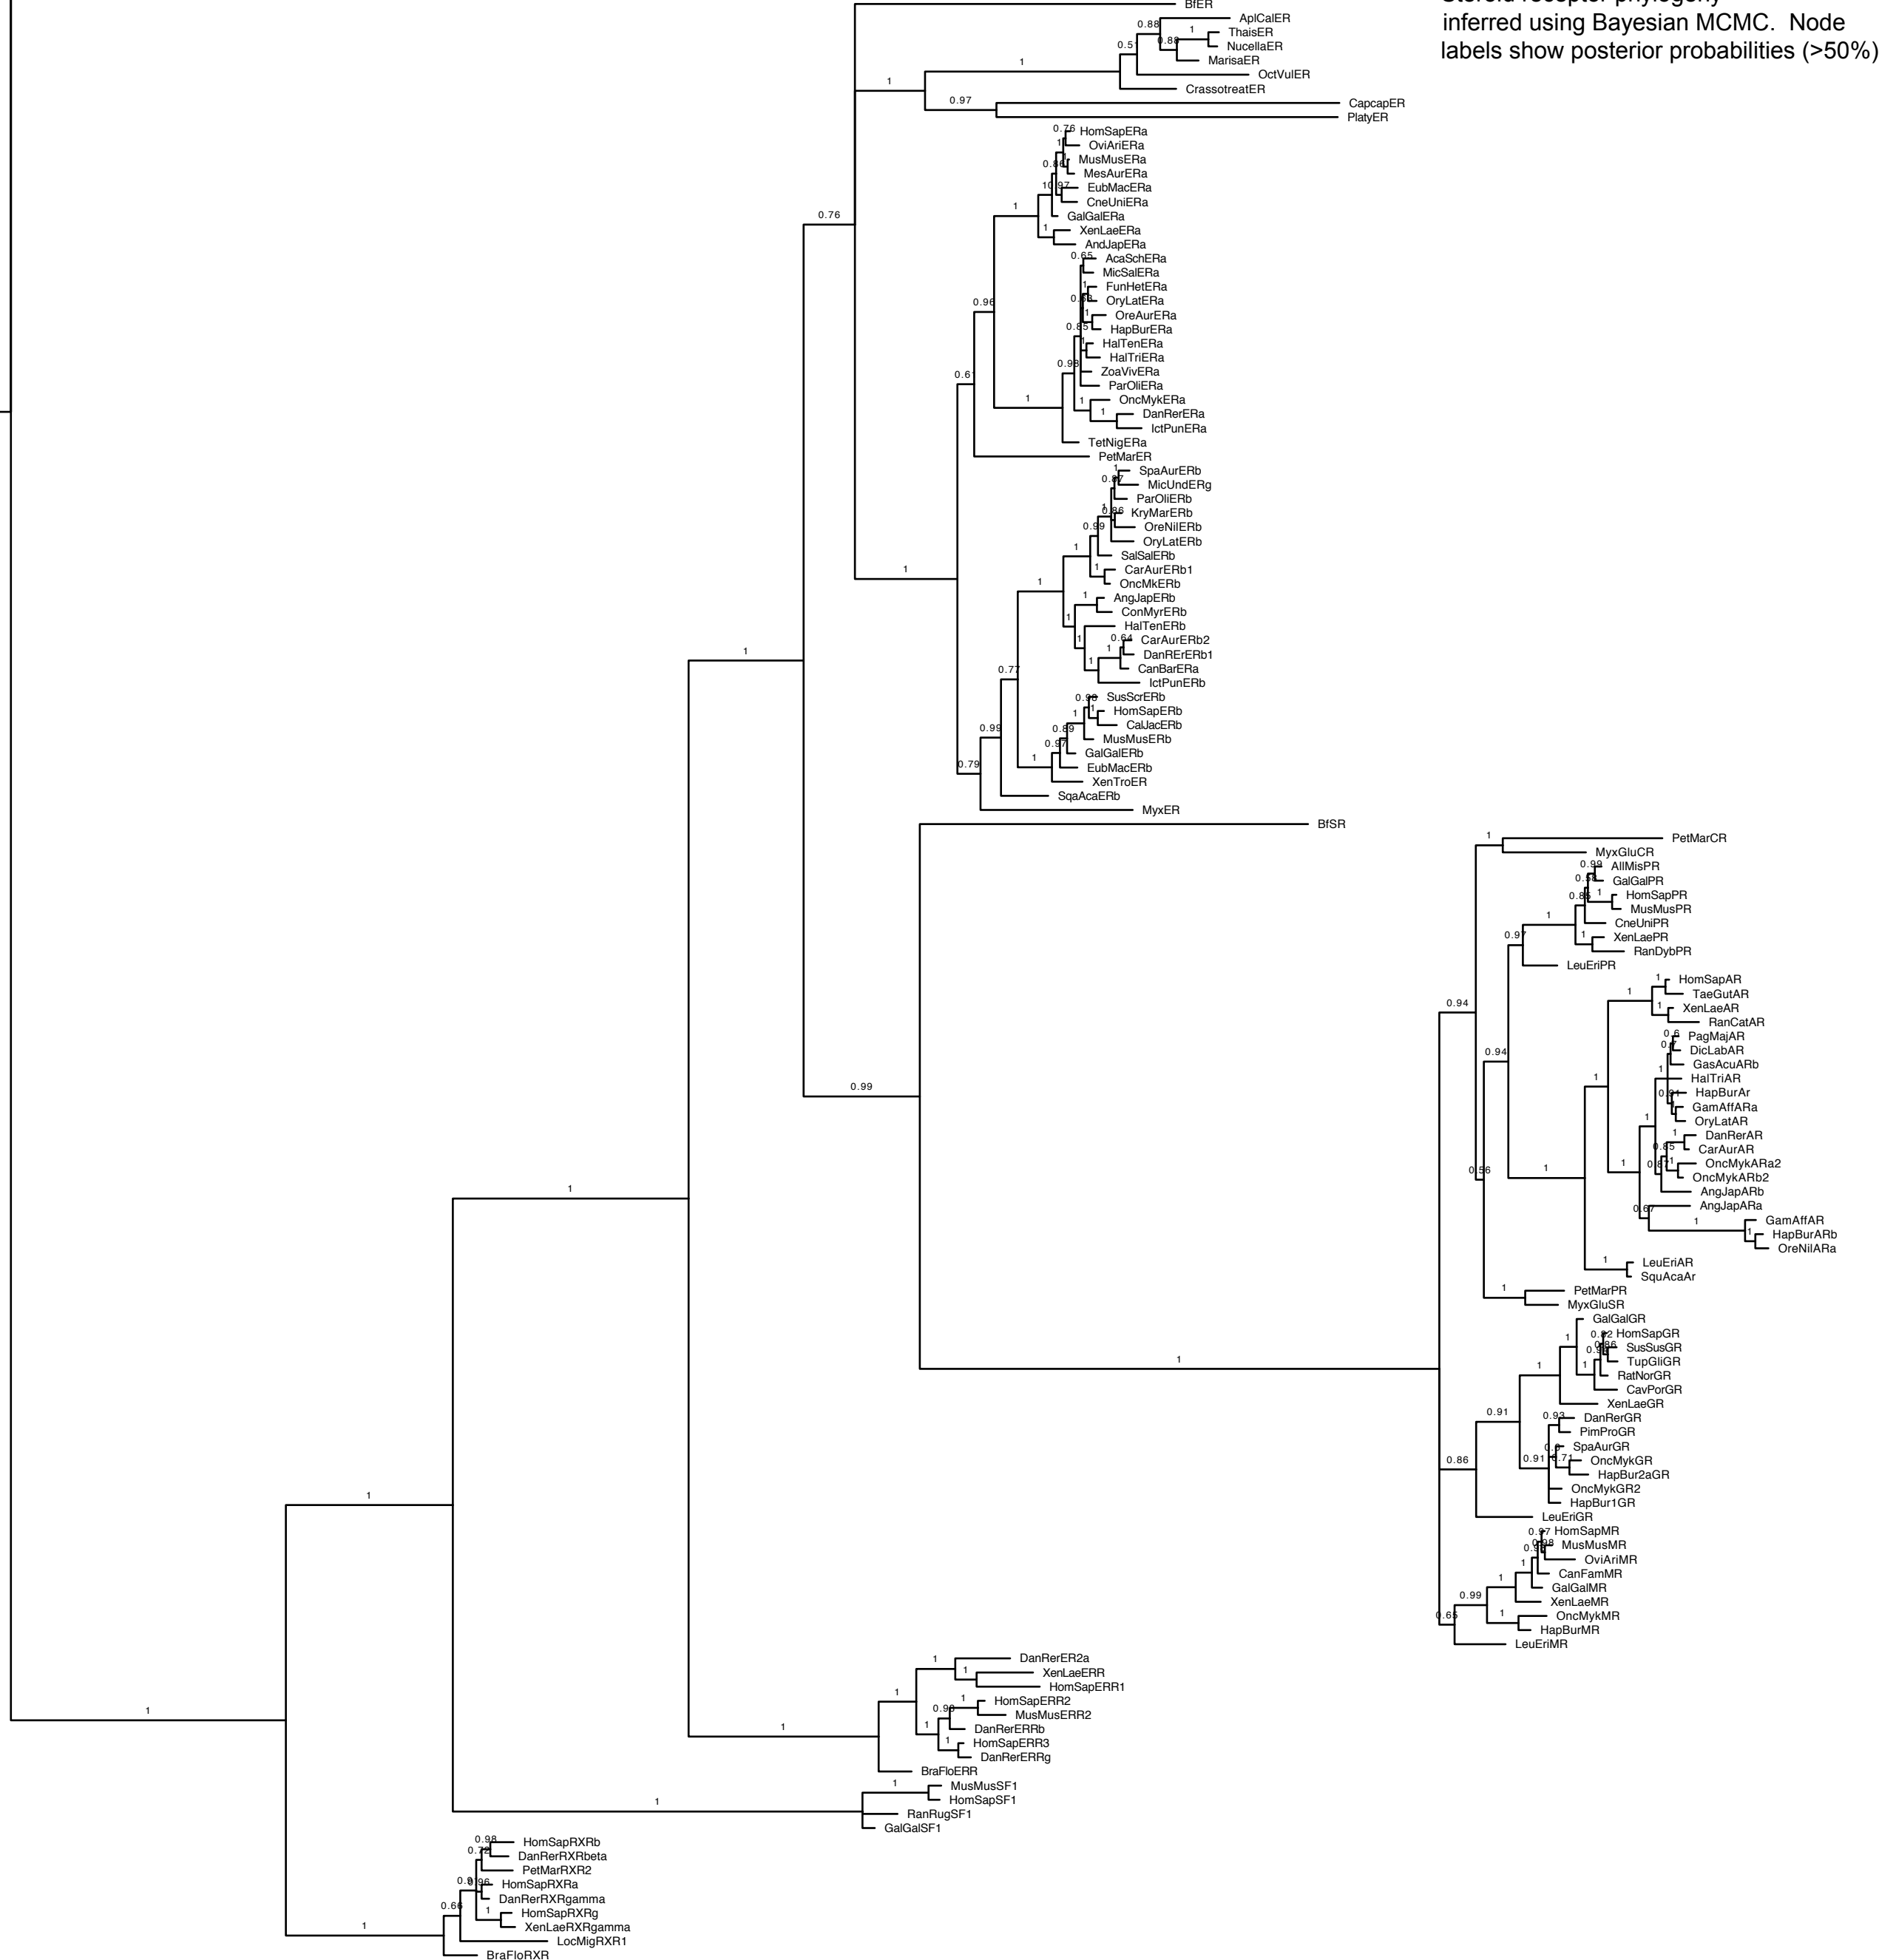

Supplement: Supplementary file [file 1]
